# Supplementary material for: Synergistic effect of well-defined dual sites boosting the oxygen reduction reaction
Source: Royal Society of Chemistry journal article supplement (doi:10.1039/c8ee02656d), 2018-01-01
Supplement: c8ee02656d1.pdf [file c8ee02656d1.pdf]

## Electronic Supplementary Information (ESI) for Energy & Environmental Science

### Synergistic effect of well-defined dual site boosting oxygen reduction reaction

*Jing Wang, ‡<sup>a</sup> Liu Wei, ‡<sup>c</sup> Gan Luo,<sup>d</sup> Zhijun Li,<sup>a</sup> Chao Zhao,<sup>a</sup> Haoran Zhang,<sup>a</sup> Mengzhao Zhu,<sup>a</sup> Qian Xu,<sup>c</sup> Xiaoqian Wang,<sup>a</sup> Changming Zhao,<sup>a</sup> Yunteng Qu,<sup>a</sup> Zhengkun Yang,<sup>a</sup> Tao Yao,<sup>c</sup> Yafei Li,<sup>d</sup> Yue Lin,<sup>\*e</sup> Yuen Wu,<sup>\*a</sup> Yadong Li<sup>b</sup>*

<sup>a</sup>Department of Chemistry, Hefei National Laboratory for Physical Sciences at the Microscale, iChEM (Collaborative Innovation Center of Chemistry for Energy Materials), University of Science and Technology of China, Hefei 230026, China;

<sup>b</sup>Department of Chemistry, Tsinghua University, Beijing 100084, China;

<sup>c</sup>National Synchrotron Radiation Laboratory, University of Science and Technology of China, Hefei 230026, China;

<sup>d</sup>Jiangsu Collaborative Innovation Centre of Biomedical Functional Materials, School of Chemistry and Materials Science, Nanjing Normal University, Nanjing, 210023, China.

<sup>e</sup>Hefei National Laboratory for Physical Sciences at the Microscale, University of Science and Technology of China, Hefei 230026, China.

‡ These authors contributed equally.

*Corresponding authors:* Y. Wu (yuenwu@mail.ustc.edu.cn), Y. Lin (linyue@ustc.edu.cn)

## 1. Material Synthesis and Characterization:

### Chemicals:

Analytical grade Zinc nitrate hexahydrate ( $\text{Zn}(\text{NO}_3)_2 \cdot 6\text{H}_2\text{O}$ ), Cobalt nitrate hexahydrate ( $\text{Co}(\text{NO}_3)_2 \cdot 6\text{H}_2\text{O}$ ), 2-methylimidazole (MeIM), Ferric chloride ( $\text{FeCl}_3 \cdot 6\text{H}_2\text{O}$ ), Cobalt chloride ( $\text{CoCl}_2 \cdot 6\text{H}_2\text{O}$ ), Hexane, Methanol were obtained from Shanghai Chemical Reagents, China. The commercial Pt/C catalyst is 20 % by wt. of ~3 nm Pt nanoparticles on Vulcan XC-72 carbon support. Nafion was acquired from Sigma-Aldrich. The commercial N doped carbon nanotubes (CNT-C, inner diameter: 5-12 nm, external diameter: 30-50 nm, length: 10-30  $\mu\text{m}$ ) was acquired from Aladdin. De-ionized water with the specific resistance of 18.25  $\text{M}\Omega \text{ cm}$  was obtained by reversed osmosis followed by ion-exchange and filtration (Clean Water Treatmenty Co., Ltd., Hefei). All chemicals were from commercial and used without further purification.

### Experimental Section:

#### Synthesis of $\text{Zn}_1\text{Co}_1\text{-BMOF}$ .

In a typical procedure,  $\text{Co}(\text{NO}_3)_2 \cdot 6\text{H}_2\text{O}$  (0.546 g) and  $\text{Zn}(\text{NO}_3)_2 \cdot 6\text{H}_2\text{O}$  (0.558 g) were dissolved in 15 mL of methanol, 2-methylimidazole (0.616 g) in 15 mL of methanol was subsequently injected into the above solution under vigorously stirring for 6 h at room temperature. The as-obtained precipitates were centrifuged and washed with methanol for several times and dried in vacuum at 60  $^\circ\text{C}$  for overnight.

#### Synthesis of (Fe,Co)/CNT.

Typically,  $\text{Zn}_1\text{Co}_1\text{-BMOF}$  (100 mg) was dispersed in 13 mL of hexane by sonication for 1 h at room temperature. 50  $\mu\text{L}$   $\text{FeCl}_3 \cdot 6\text{H}_2\text{O}$  (150  $\text{mg mL}^{-1}$ ) was added dropwisely to the above solution under ultrasound for 10 min. The vial containing the slurry was stirred at room temperature for 2 h. The impregnated  $\text{Zn}_1\text{Co}_1\text{-BMOF}$  sample was centrifuged and dried in vacuum at 60  $^\circ\text{C}$  for overnight. The powder of the impregnated  $\text{Zn}_1\text{Co}_1\text{-BMOF}$  sample was placed in a tube furnace and then heated to the desired temperature (900  $^\circ\text{C}$ ) for 2 h with a heating rate of 5  $^\circ\text{C min}^{-1}$  under a flowing of  $\text{N}_2$  before cooled to room temperature naturally to give the (Fe,Co)/CNT. The ICP result showed the metal contents for Fe and Co in (Fe,Co)/CNT with Fe-Co dual site were 1.21 % and 1.13 %, respectively.

#### Synthesis of FeCo NPs/CNT.

The synthesis of FeCo alloy nanoparticles in N doped carbon nanotubes (FeCo NPs/CNT) was similar to (Fe,Co)/CNT, except for increasing the concentration of  $\text{FeCl}_3 \cdot 6\text{H}_2\text{O}$  from  $150 \text{ mg mL}^{-1}$  to  $200 \text{ mg mL}^{-1}$ .

#### **Synthesis of Fe/CNT-C.**

The single Fe atoms on N doped carbon nanotubes (Fe/CNT-C) was prepared as a reference.. The commercial N doped carbon nanotubes were used as the support to stabilize the single Fe atoms. CNT-C (20 mg) was dispersed in 10 mL of  $\text{H}_2\text{O}$  by sonication for 1 h at room temperature.  $\text{FeCl}_3 \cdot 6\text{H}_2\text{O}$  (1 mg) was added to the above solution under vigorously stirring for 2 h. The impregnated CNT-C sample was centrifuged and dried in vacuum at  $60 \text{ }^\circ\text{C}$  for overnight. The powder of the impregnated CNT-C sample was placed in a tube furnace and then heated to the desired temperature ( $900 \text{ }^\circ\text{C}$ ) for 2 h with a heating rate of  $5 \text{ }^\circ\text{C min}^{-1}$  under a flowing of  $\text{N}_2$  before cooled to room temperature naturally to give the Fe/CNT-C.

#### **Synthesis of Co/CNT-C.**

Single Co atoms on N doped carbon nanotubes (Co/CNT-C) can be easily obtained by the above method, replacing  $\text{FeCl}_3 \cdot 6\text{H}_2\text{O}$  with  $\text{CoCl}_2 \cdot 6\text{H}_2\text{O}$ .

#### **Synthesis of FeCo NPs/CNT-C.**

FeCo alloy nanoparticles on N doped carbon nanotubes (FeCo NPs/CNT-C) can be prepared by the same method, adding  $\text{FeCl}_3 \cdot 6\text{H}_2\text{O}$  (2 mg) and  $\text{CoCl}_2 \cdot 6\text{H}_2\text{O}$  (2 mg) into the solution of CNT-C.

#### **Synthesis of FeCo clusters/CNT-C.**

FeCo clusters on N doped carbon nanotubes (FeCo clusters/CNT-C) was synthesized by acid leaching of FeCo NPs/CNT-C for overnight.

#### **Characterization:**

Powder X-ray diffraction patterns of samples were recorded using a Rigaku Miniflex-600 with  $\text{Cu K}\alpha$  radiation ( $\text{Cu K}\alpha$ ,  $\lambda = 0.15406 \text{ nm}$ , 40 kV and 15 mA). The morphologies were characterized by TEM (Hitachi-7700, 100KV). The high-resolution TEM, HAADF-STEM images the corresponding Electron energy-loss spectroscopy were recorded by a FEI Tecnai G2 F20 S-Twin high-resolution transmission electron microscope working at 200 kV and on a JEOL JEM-ARM200F TEM/STEM with a spherical aberration corrector working at 300 kV. The SEM was carried out by a JSM-6700F SEM. Nitrogen sorption measurement was conducted using a Micromeritics ASAP 2020 system at 77 K. Photoemission spectroscopy experiments (XPS) were performed at the Catalysis and Surface Science End station at the BL11U beamline of National

Synchrotron Radiation Laboratory (NSRL) in Hefei, China. Fourier transform infrared spectra (FT-IR) of the samples were recorded on a VECTOR-22FT-IR spectrometer over potassium bromide pellet. Raman scattering spectra were recorded with a Renishaw System 2000 spectrometer using the 514.5 nm line of Ar<sup>+</sup> for excitation. Elemental analysis of Fe and Co in the solid samples was detected by an Optima 7300 DV inductively coupled plasma atomic emission spectrometer (ICP-AES). XAFS measurement and data analysis: XAFS spectra at the Co K-edge (7709 eV) and Fe K-edge (7112 eV) were measured at the beamline 1W1B station of the Beijing Synchrotron Radiation Facility, China. The Co K-edge XANES data were recorded in a fluorescence mode. Co foil, CoPc were used as references. The Fe K-edge XANES data were recorded in a fluorescence mode. Fe foil, FePc, Fe<sub>3</sub>O<sub>4</sub> were used as references. The storage ring was working at the energy of 2.5 GeV with an average electron current of 250 mA. The hard X-ray was monochromatized with Si (111) double-crystals. The acquired EXAFS data were extracted and processed according to the standard procedures using the ATHENA module implemented in the IFEFFIT software packages. The k<sup>3</sup>-weighted EXAFS spectra were obtained by subtracting the post-edge background from the overall absorption and then normalizing with respect to the edge-jump step. Subsequently, k<sup>3</sup>-weighted  $\chi(k)$  data in the k-space ranging from 2.5–11.2 Å<sup>-1</sup> were Fourier transformed to real (R) space using a hanning windows ( $dK = 1.0 \text{ \AA}^{-1}$ ) to separate the EXAFS contributions from different coordination shells.

## 2. Electrochemical Measurements:

### Electrochemical measurements for ORR.

All catalysts were prepared by mixing 10 mg of the catalysts in 1 mL of solution containing 480  $\mu\text{L}$  of ethanol, 480  $\mu\text{L}$  of H<sub>2</sub>O and 40  $\mu\text{L}$  of 5% Nafion solution, followed by ultrasonication for 20 min to form homogeneous catalysts inks. Commercial 20 % wt Pt/C sample was prepared by dispersing 4 mg of the catalyst in 1 mL of solution. Next, a certain volume of the catalyst ink was carefully dropped onto the polished glassy carbon rotating disk electrode (RDE) or rotating ring disk electrode (RRDE) to yield a desirable catalyst loading. For RDE and RRDE test, the absolute mass loading was 0.5102 mg cm<sup>-2</sup> of nonprecious catalysts and the loading for Pt/C (w.t. 20%) was 0.102 mg cm<sup>-2</sup> in 0.1 M KOH.

Electrochemical measurements were carried out in a three-electrode system on a CHI 760E electrochemical workstation (Shanghai Chenhua, China) in 0.1 M KOH electrolyte. A glassy carbon (GC) RDE of 5 mm in diameter coated with the catalyst ink was served as the working electrode, a Ag/AgCl and Pt wire were used as reference and counter electrode. Prior to the measurement, a N<sub>2</sub>/O<sub>2</sub> flow was used through the electrolyte in the cell for 30 min to saturate it with N<sub>2</sub>/O<sub>2</sub>. The electrochemical experiments were conducted in O<sub>2</sub>-saturated 0.1 M KOH for the oxygen reduction reaction at room temperature. The RDE tests were measured at various rotating speed from 900 to 2500 rpm with a sweep rate of 10 mV s<sup>-1</sup>. The cyclic voltammetry (CV) experiments were cycled in N<sub>2</sub>/O<sub>2</sub>-saturated 0.1 M KOH electrolyte solutions with a scan rate of 50 mV s<sup>-1</sup>. For the ORR at a RDE, the electron transfer number (n) and kinetic current density (J<sub>K</sub>) were calculated from the Koutecky-Levich equation:

$$\frac{1}{J} = \frac{1}{J_L} + \frac{1}{J_K} = \frac{1}{B\omega^2} + \frac{1}{J_K}$$

$$B = 0.62nFC_0D_0^{2/3}V^{-1/6}$$

where J is the measured current density,  $J_K$  and  $J_L$  are the kinetic and limiting current densities,  $\omega$  is the angular velocity of the disk, n is the electron transfer number, F is the Faraday constant (96485 C mol<sup>-1</sup>),  $C_0$  is the bulk concentration of O<sub>2</sub> (1.2 × 10<sup>-6</sup> mol cm<sup>-3</sup>),  $D_0$  is the diffusion coefficient of O<sub>2</sub> (1.9 × 10<sup>-5</sup> cm<sup>2</sup> s<sup>-1</sup>), and V is the kinematic viscosity of the electrolyte (0.01 cm<sup>2</sup> s<sup>-1</sup>).

For RRDE tests, a computer-controlled CHI 760E electrochemical workstation was employed and the disk electrode was scanned cathodically at a rate of 10 mV s<sup>-1</sup> and the ring electrode potential was set to 1.20 V vs. RHE. The hydrogen peroxide yield (H<sub>2</sub>O<sub>2</sub> %) and the electron transfer number (n) were determined by the following equations:

$$H_2O_2 (\%) = 200 \times \frac{\frac{I_r}{N}}{I_d + \frac{I_r}{N}}$$

$$n = 4 \times \frac{I_d}{I_d + \frac{I_r}{N}}$$

Where  $I_d$  is the disk current,  $I_r$  is the ring current, and N = 0.4 is the current collection efficiency of the Pt ring.

The accelerated durability tests of the catalysts were performed in the O<sub>2</sub>-saturated 0.1 M KOH electrolyte at room temperature by applying potential cycling between 1.0 and 0.6 V vs. RHE at a sweep rate of 50 mV s<sup>-1</sup> for 10,000 cycles.

Turnover frequency (TOF) of the Fe/CNT-C, Co/CNT-C and (FeCo)/CNT were calculated based on the mole number of active Fe single sites, Co single sites and Fe-Co dual sites, respectively. The TOF values were calculated using the equation:

$$TOF = \frac{J \times a}{4 \times m \times F}$$

Where J is the measured current density at 0.9 V, a is the surface area of the electrode (0.196 cm<sup>2</sup> for the GC disk electrode), 4 is the number of electrons transferred during O<sub>2</sub> reduction, m is the mole number of active Fe single sites, Co single sites and Fe-Co dual sites on the electrode, and F is the Faraday constant (F = 96,485 C mol<sup>-1</sup>).

#### Electrochemical measurements for Zn-air battery.

Primary Zn-air batteries were tested in a home-built electrochemical cell. For catalyst ink preparation, 10 mg of the (Fe,Co)/CNT was ultrasonically dispersed in 1 mL of solution containing 480  $\mu\text{L}$  of ethanol, 480  $\mu\text{L}$  of  $\text{H}_2\text{O}$  and 40  $\mu\text{L}$  of 5% Nafion solution. The homogeneous ink (0.1 mL) was loaded on carbon fiber paper (1  $\text{cm}^2$ ), with a loading density of 1  $\text{mg cm}^{-2}$ , as the air cathode, and Zn foil was used as the anode in  $\text{O}_2$ -saturated 6M KOH solution. While, commercial 20 % wt Pt/C sample was prepared by dispersing 4 mg of the catalyst in 1 mL of solution, with a loading of 0.4  $\text{mg cm}^{-2}$ . All data were collected from the as-fabricated cell with a CHI 760E electrochemical workstation (Shanghai Chenhua, China) at room temperature.

### 3. Computational Methods

Spin-unrestricted DFT calculations were performed in the VASP<sup>1,2</sup> within the projector-augmented plane wave approach<sup>3,4</sup> and GGA-PBE functional.<sup>5</sup> The plane-wave set with a cutoff energy of 400 eV were adopted in all computations. Calculations reached Convergence criterions until energy and forces dropped below  $10^{-5}$  eV and 0.03 eV/ $\text{\AA}$ , respectively. Figure 3E shows the geometrical structure of the (Fe,Co)/CNT unit where Fe-Co/N6-moiety embedded in graphene (50 C atoms). Similar to (Fe,Co)/CNT, Co SAs/N-C unit embedding Co/N4-moiety into carbon matrix (54 C atoms). The vacuum space of 12  $\text{\AA}$  at least was selected to remove the virtual image interaction. The  $3 \times 3 \times 1$   $k$ -point samplings were chosen for all computations.

The free energies ( $G$ ) of adsorbates and molecules can be calculated by:  $G = E_{\text{DFT}} + \text{ZPE} - TS$ , where  $E_{\text{DFT}}$ , ZPE, and  $S$  represent ground state energy, zero point energy, and entropy, respectively. For adsorbates, ZPE and  $S$  are obtained by vibrational frequencies calculations with harmonic approximation, whereas for molecules these values are taken from the NIST database.<sup>6</sup> The solvent effect on  $\text{OOH}^*$  and  $\text{OH}^*$  is included using the Poisson-Boltzmann implicit solvation model.<sup>7</sup>

$\text{O}_2$  activation generally follows one of the two mechanisms, namely associative and dissociative pathways. Fe-Co dual site prefers associative ORR mechanism, since there are no spontaneous dissociation of  $\text{O}_2$  during structure optimization. Therefore, in alkaline medium, the ORR process on (Fe,Co)/CNT may involve the following steps (4-electron pathway):

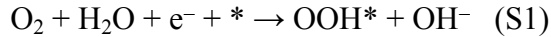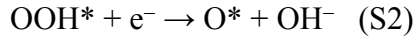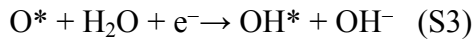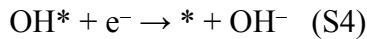

Moreover, the 2-electron pathway can be expressed as:

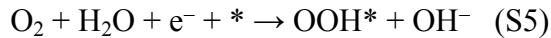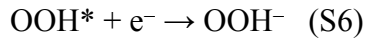

The computational hydrogen electrode (CHE) model<sup>8</sup> is used to account for the effects of electrode potential ( $U$ ) and pH on the free energy of the electron transfer steps:  $\Delta G_U = -eU$  and

$\Delta G_{\text{pH}} = -k_{\text{B}}T \ln 10 \times \text{pH}$ . The theoretical limiting potential ( $U_{\text{lim}}$ ) for a given catalyst is determined by the maximum free energy change of the electronic steps ( $\Delta G_{\text{max}}$ ):  $U_{\text{lim}} = -\Delta G_{\text{max}}/e$ . Note that the free energy diagram of ORR shown in present work has performed a potential correction vs. RHE.

#### 4. Supporting Figures and Tables:

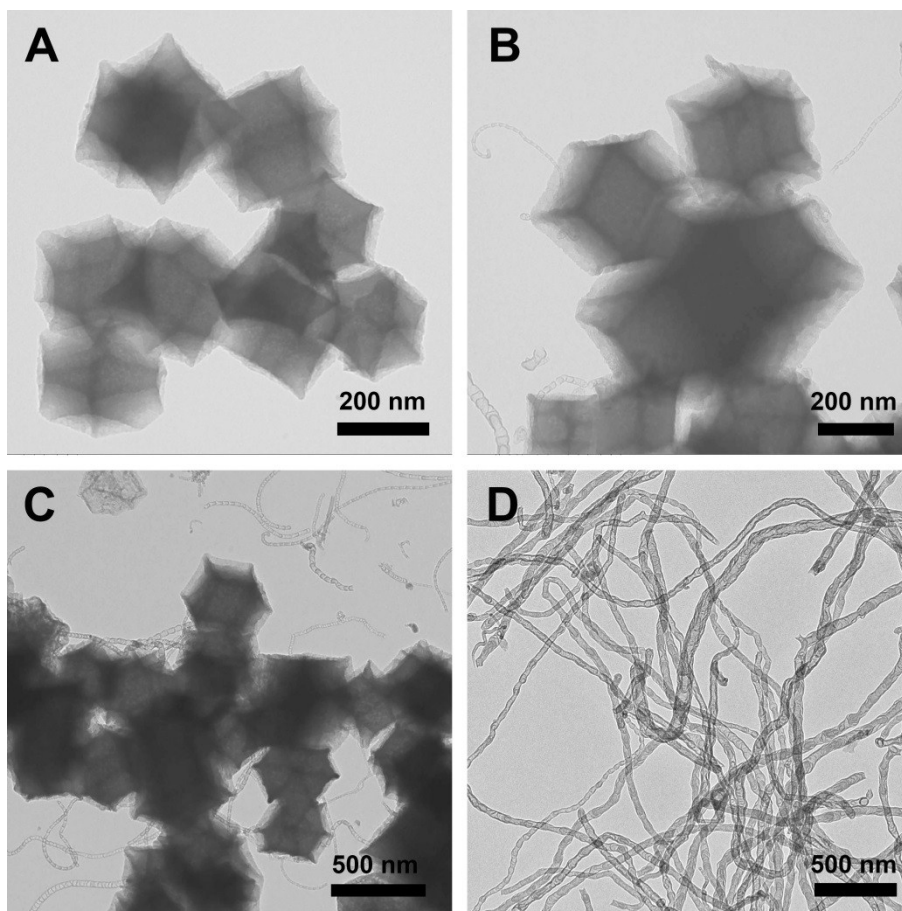

**Fig. S1.** (A-D) TEM images of the products obtained in different temperatures: (A) 800 °C, 0 h, (B) 900 °C, 0 h, (C) 900 °C, 0.5 h, (D) 900 °C, 2 h.

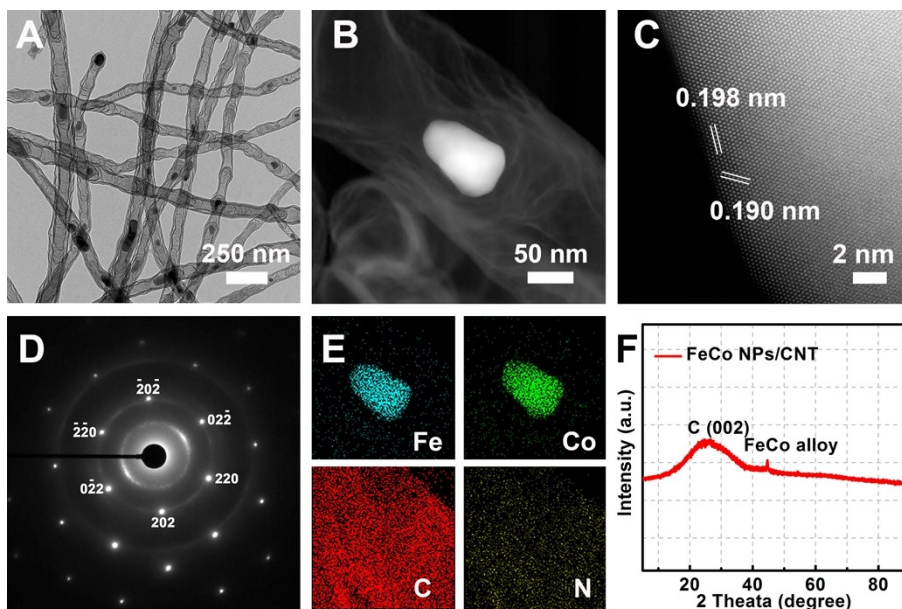

**Fig. S2:** (A) TEM image, (B) HAADF-STEM image of FeCo NPs/CNT. (C) HAADF-STEM image and electron diffraction pattern of FeCo NPs in FeCo NPs/CNT. (E) Corresponding EELS mapping images of Fe, Co, C, N.



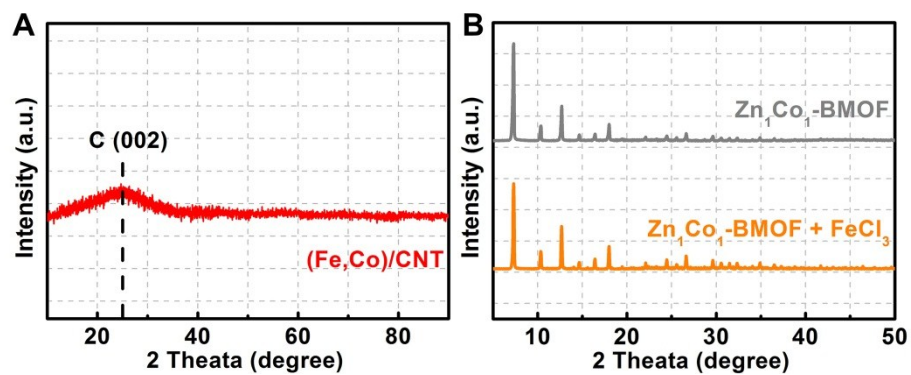

**Fig. S3.** (A) XRD pattern of (Fe,Co)/CNT. (B) XRD patterns of Zn<sub>1</sub>Co<sub>1</sub>-BMOF and Zn<sub>1</sub>Co<sub>1</sub>-BMOF+FeCl<sub>3</sub>.

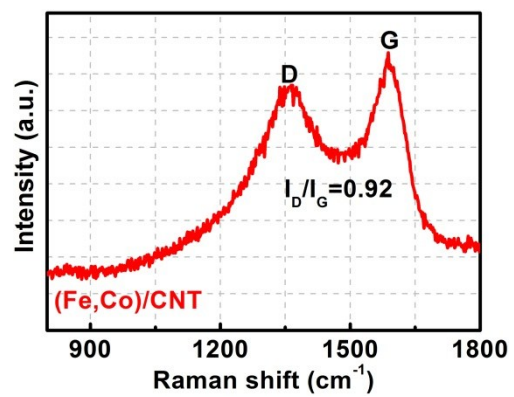

**Fig. S4.** Raman spectrum for (Fe,Co)/CNT.

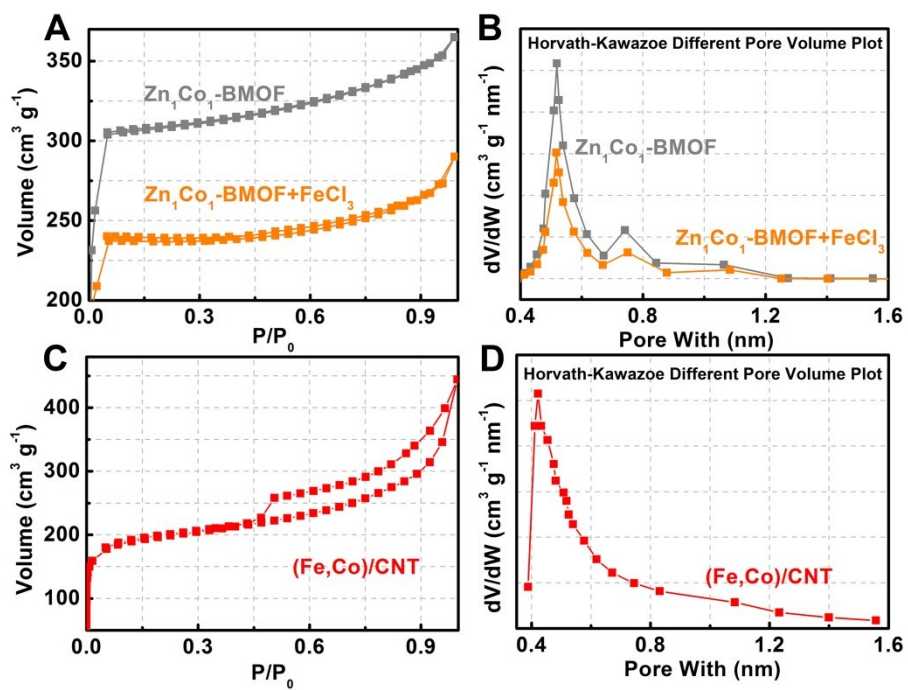

**Fig. S5.** (A) N<sub>2</sub> adsorption and desorption isotherms and (B) pore diameter distributions of Zn<sub>1</sub>Co<sub>1</sub>-BMOF and Zn<sub>1</sub>Co<sub>1</sub>-BMOF+FeCl<sub>3</sub>. (C) N<sub>2</sub> adsorption and desorption isotherms and (D) pore diameter distribution of (Fe,Co)/CNT.

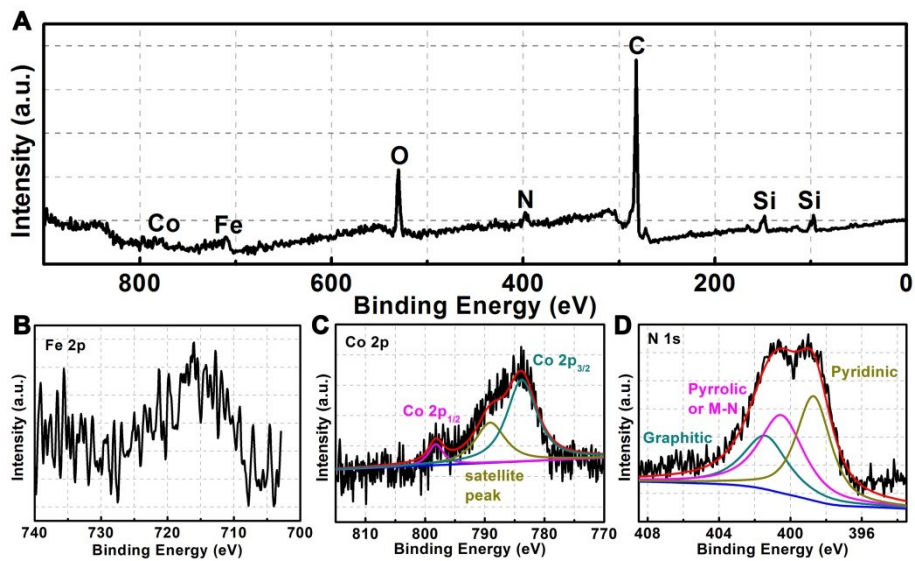

**Fig. S6.** XPS spectra of (A) survey scan, (B) Fe 2p, (C) Co 2p, (D) N 1s for (Fe,Co)/CNT.

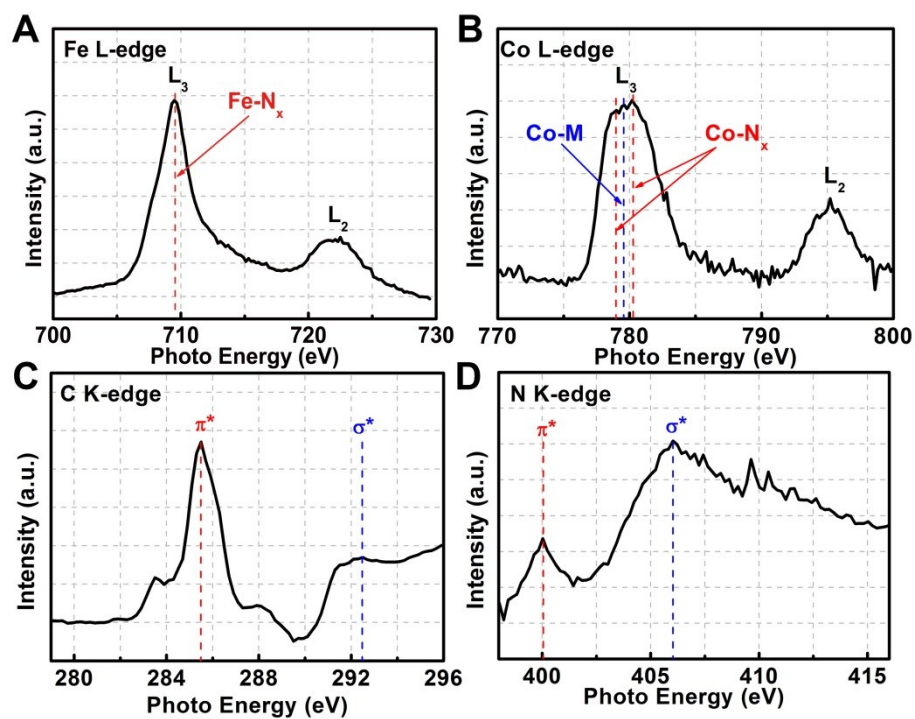

**Fig. S7.** (A) Fe L-edge, (B) Co L-edge XANES spectra of (Fe,Co)/CNT. (C) C K-edge, and (D) N K-edge XAS spectra of (Fe,Co)/CNT.

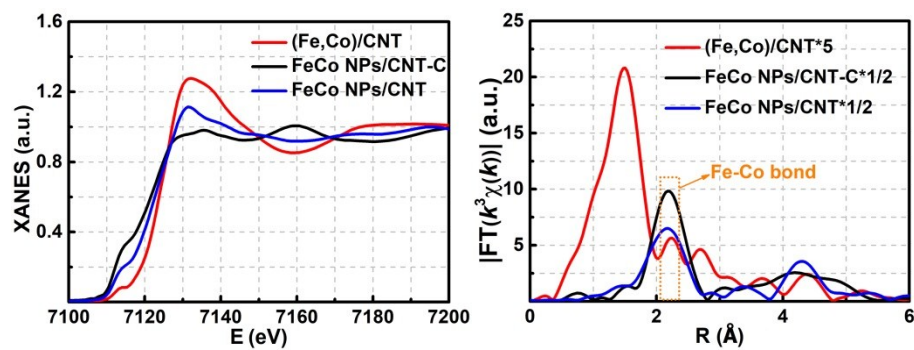

**Fig. S8.** (A) Fe K-edge XANES spectra, (B) Fourier transformed (FT)  $k^3$ -weighted  $\chi(k)$ -function of the EXAFS spectra for Fe K-edge of (Fe,Co)/CNT, FeCo NPs/CNT-C and FeCo NPs/CNT.

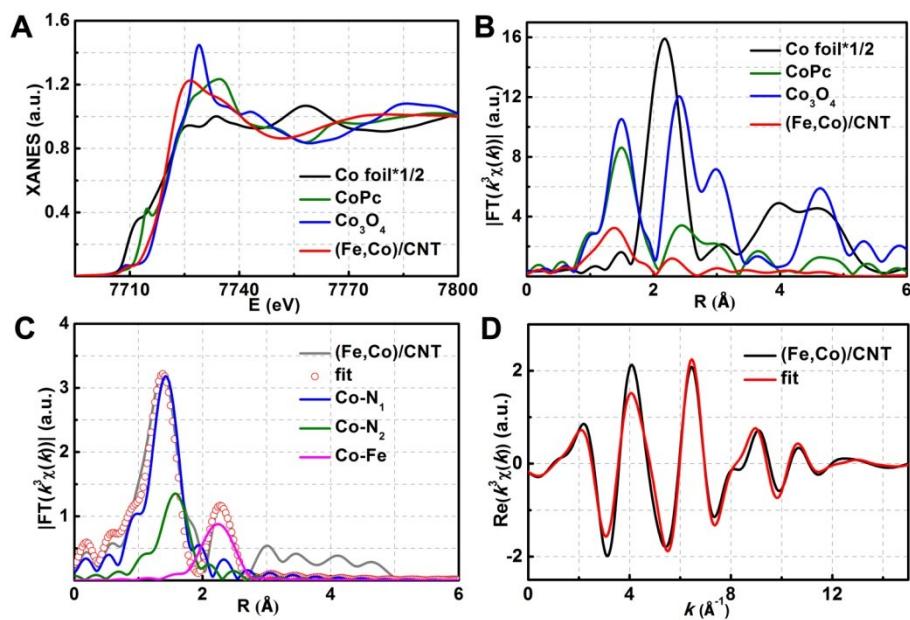

**Fig. S9.** (A) Co K-edge XANES spectra of (Fe,Co)/CNT. (B) Fourier transformed (FT)  $k^3$ -weighted  $\chi(k)$ -function of the EXAFS spectra for Co K-edge of (Fe,Co)/CNT. (C,D) The corresponding Co K-edge EXAFS fitting curves of (Fe,Co)/CNT.

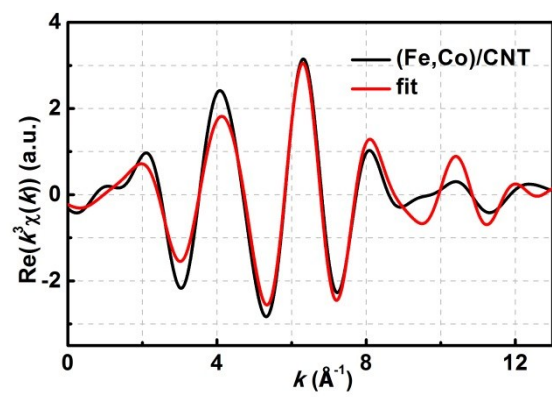

**Fig. S10.** The corresponding Fe K-edge EXAFS fitting curves of (Fe,Co)/CNT.



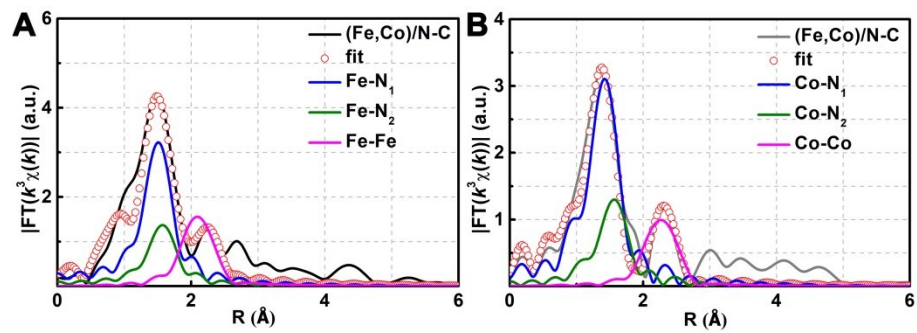

**Fig. S11:** (A) The Fe K-edge (B) Co K-edge EXAFS fitting curves of (Fe,Co)/CNT.

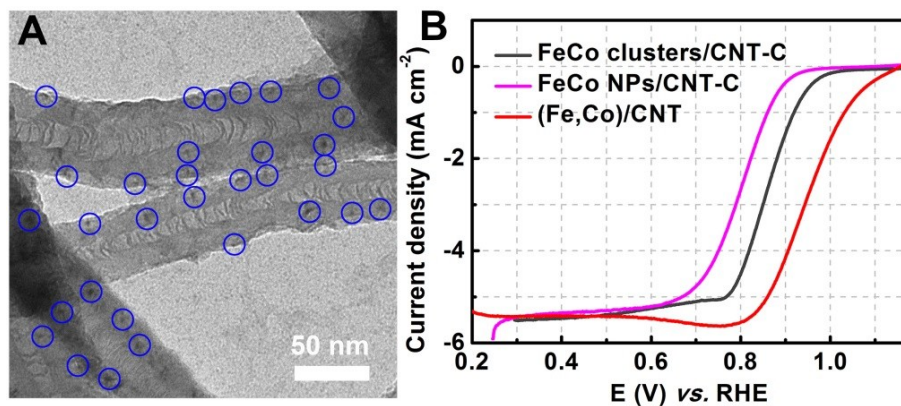

**Fig. S12:** (A) TEM image of FeCo clusters/CNT-C. (B) RDE polarization curves of FeCo NPs/CNT-C, FeCo clusters/CNT-C, and (Fe,Co)/CNT in O<sub>2</sub>-saturated 0.1 M KOH with a sweep rate of 10 mV s<sup>-1</sup> and a rotation rate of 1600 rpm.

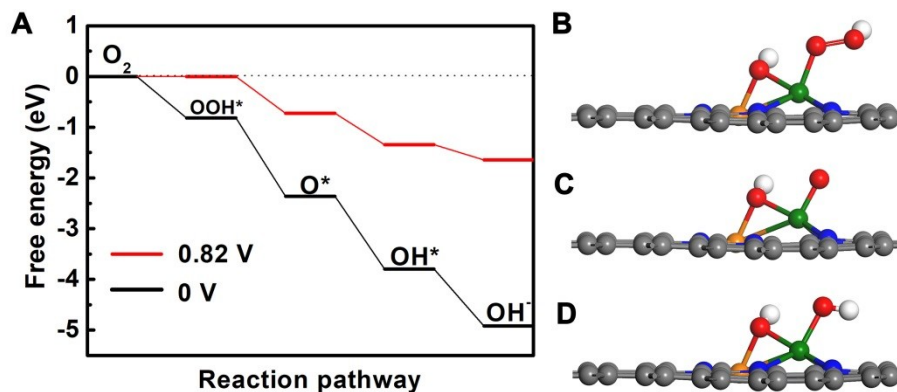

**Fig. S13.** (A) Free energy diagram of ORR on Co site of OH\* anchored on (Fe,Co)/CNT at 0 V and 0.82 V. (B-D) Geometric structures of the intermediates (B) OOH\*, (C) O\*, and (D) OH\*. The free energy curves show that the OOH\* formation step (the first step) would be endothermic when U is higher than 0.82 V.

Herein, we mainly focused on the reaction pathway over the Fe-Co dual sites of (Fe, Co)/CNT and the Co site in Co SAs/N-C, which were modeled as Fe-Co/N6 and Co-N4 embedded graphene nanosheets, respectively. The possible oxygen reduction mechanism steps are summarized in equations S(1) to S(4). The adsorption free-energies of ORR intermediates (Table S5) and the reaction free-energies ( $\Delta G$ ) of elementary steps for all studied systems were then computed employing the computational hydrogen electrode model.

We firstly studied the ORR processes that proceeded on bare (Fe, Co)/CNT following the four-electron (4e) reduction pathway. According to our computations, the Fe-Co dual sites of (Fe, Co)/CNT would be covered by OH\* species as the final reduction of OH\* species to OH<sup>-</sup>. This is energetically unfavorable with a  $\Delta G$  of 1.21 eV (Fig. S14). Interestingly, the OH\* species form a Fe-O-Co bridge bond on (Fe, Co)/CNT, thus neither Fe nor Co site would be poisoned. In contrast to (Fe, Co)/CNT, the Co site of Co SAs/N-C would not be covered by OH\*, as the reduction from OH\* to OH<sup>-</sup> is exothermic by 0.67 eV (Fig. S15).

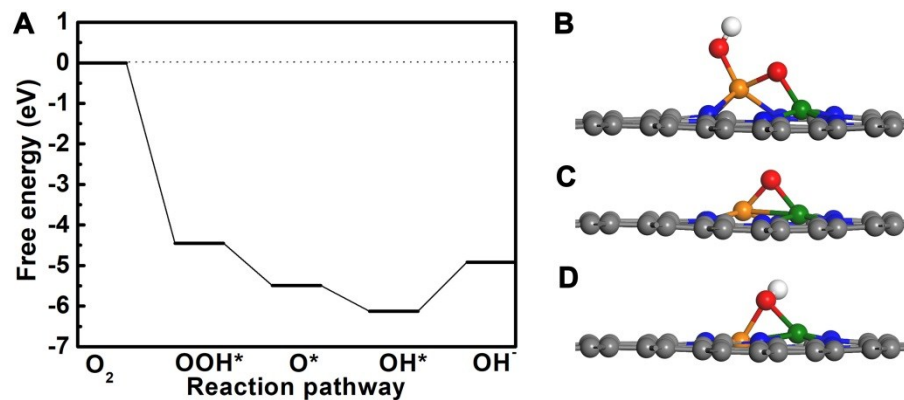

**Fig. S14.** (A) Free energy diagram for ORR on Fe-Co dual sites of (Fe,Co)/CNT. (B-D) Geometric structures of the intermediates (B)  $OOH^*$ , (C)  $O^*$ , and (D)  $OH^*$ . The free energy curves show that the  $OH^*$  removal step (the last step) is endothermic by 1.21 eV, implying Fe-Co bridge site of (Fe,Co)/CNT is occupied by  $OH^*$ .

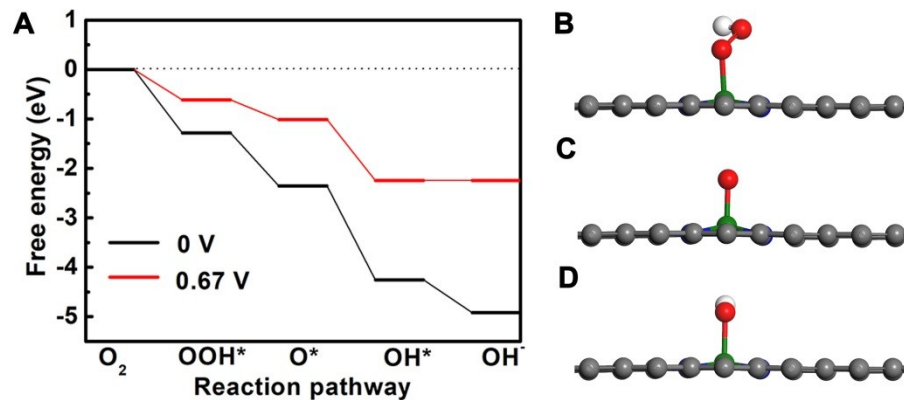

**Fig. S15.** (A) Free energy diagram for ORR on Co site of Co SAs/N-C at 0 V and 0.67 V. (B-D) Geometric structures of the intermediates (B)  $OOH^*$ , (C)  $O^*$ , and (D)  $OH^*$ . The free energy curves show that the  $OH^*$  remove step (the last step) would be endothermic when  $U$  is higher than 0.67 V.

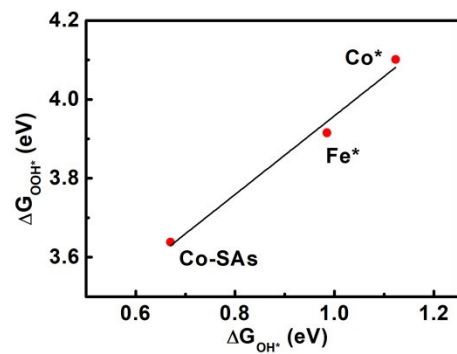

**Fig. S16.** The linear relationship ( $y=x+2.94$ ) between  $\Delta G_{\text{OOH}^*}$  and  $\Delta G_{\text{OH}^*}$  in which Fe\*, Co\*, Co-SAs are Fe, Co sites on OH\* saturated (Fe,Co)/CNT and Co sites on bare Co SAs/N-C.

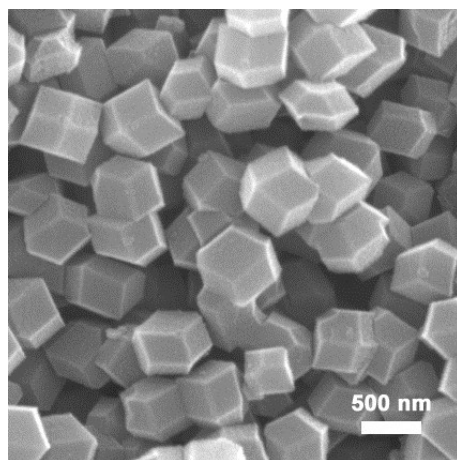

**Fig. S17.** SEM of Zn<sub>1</sub>Co<sub>1</sub>-BMOF.

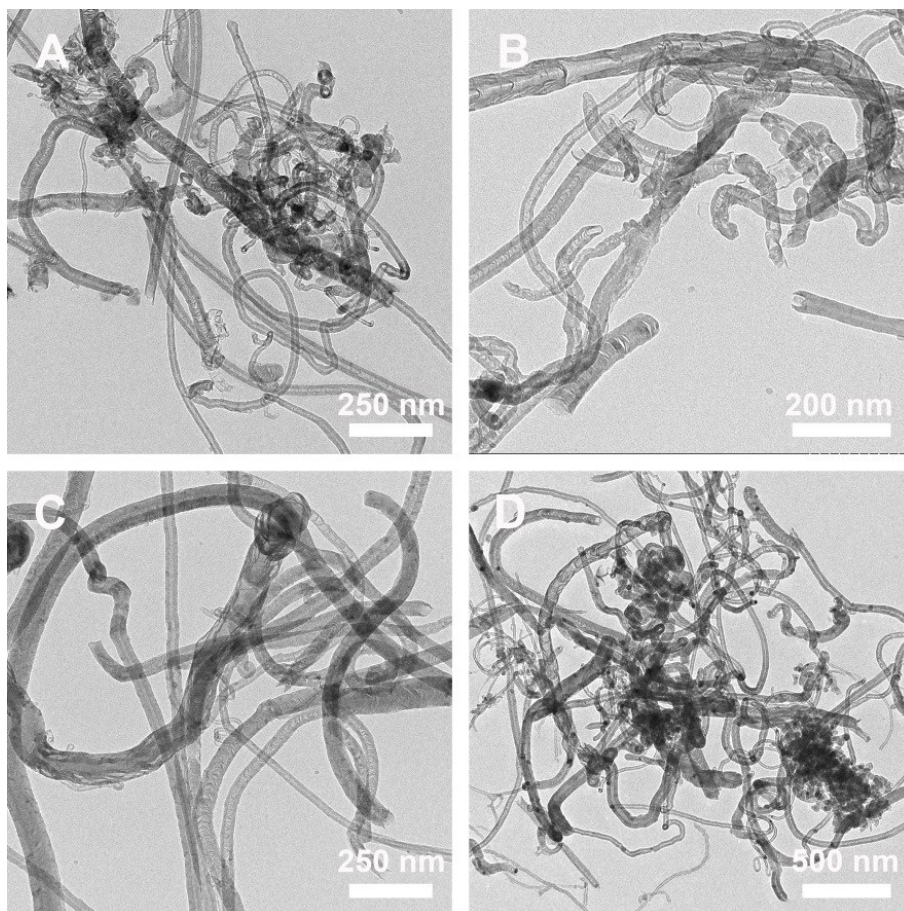

**Fig. S18:** TEM images of CNT-C (A), Co/CNT-C (B), Fe/CNT-C (C), FeCo NPs/CNT-C (D).



**Table S1.** EXAFS data fitting results of (Fe,Co)/CNT.

| Sample      | Edge | Path              | N   | R(Å) | $\sigma^2$ (10-<br>3Å <sup>2</sup> ) | $\Delta E_0$<br>(eV) | R-<br>factor |
|-------------|------|-------------------|-----|------|--------------------------------------|----------------------|--------------|
| (Fe,Co)/CNT | Fe   | Fe-N <sub>1</sub> | 2.2 | 1.98 | 3.9                                  | -3.5                 | 0.007        |
|             |      | Fe-N <sub>2</sub> | 1.0 | 2.05 | 3.9                                  | -3.5                 |              |
|             |      | Fe-Co             | 0.8 | 2.51 | 7.4                                  | -4.0                 |              |
|             | Co   | Co-N <sub>1</sub> | 2.1 | 1.90 | 4.4                                  | -6.2                 | 0.007        |
|             |      | Co-N <sub>2</sub> | 1.0 | 2.05 | 4.4                                  | -6.2                 |              |
|             |      | Co-Fe             | 0.6 | 2.56 | 10.7                                 | 9.9                  |              |

N, coordination number; R, distance between absorber and backscatter atoms;  $\sigma^2$ , the Debye-Waller factor value;  $\Delta E_0$  (eV), inner potential correction accounts for the difference in the inner potential between the sample and the reference compound.

**Table S2.** EXAFS data fitting results of (Fe,Co)/CNT.

| Sample      | Edge | Path              | N   | R(Å) | $\sigma^2$ (10-<br>3Å <sup>2</sup> ) | $\Delta E_0$<br>(eV) | R-<br>factor |
|-------------|------|-------------------|-----|------|--------------------------------------|----------------------|--------------|
| (Fe,Co)/CNT | Fe   | Fe-N <sub>1</sub> | 2.2 | 1.98 | 3.9                                  | -3.5                 | 0.010        |
|             |      | Fe-N <sub>2</sub> | 1.0 | 2.05 | 3.9                                  | -3.5                 |              |
|             |      | Fe-Fe             | 0.8 | 2.50 | 8.0                                  | -5.8                 |              |
|             | Co   | Co-N <sub>1</sub> | 2.1 | 1.90 | 4.4                                  | -6.5                 | 0.010        |
|             |      | Co-N <sub>2</sub> | 1.0 | 2.04 | 4.4                                  | -6.5                 |              |
|             |      | Co-Co             | 0.6 | 2.58 | 10.3                                 | 9.6                  |              |

N, coordination number; R, distance between absorber and backscatter atoms;  $\sigma^2$ , the Debye-Waller factor value;  $\Delta E_0$  (eV), inner potential correction accounts for the difference in the inner potential between the sample and the reference compound.

**Table S3** Comparison of ORR activities among different nonprecious catalysts in 0.1 M KOH.

| Catalysts                | Scan rate (mV s <sup>-1</sup> ) | Rotation rate (rpm) | Onset potential (V vs. RHE) | Half-wave potential (V vs. RHE) | Current density at 0.9 V (vs. RHE mA cm <sup>-2</sup> ) | Ref.             |
|--------------------------|---------------------------------|---------------------|-----------------------------|---------------------------------|---------------------------------------------------------|------------------|
| (Fe,Co)/CNT              | 10                              | 1600                | 1.15                        | 0.954                           | 4.12                                                    | <b>This work</b> |
| Fe/N/C                   | 5                               | 900                 | ~1.10                       | 0.930                           | ~2.30                                                   | <sup>9</sup>     |
| FePc-Py-CNT              | 10                              | -                   | ~0.99                       | 0.915                           | ~3.30                                                   | <sup>10</sup>    |
| Fe-ISAs/CN               | 10                              | 1600                | ~1.00                       | 0.900                           | ~2.90                                                   | <sup>11</sup>    |
| Fe@C-FeNC-2              | 10                              | 1600                | ~1.04                       | 0.899                           | ~2.60                                                   | <sup>12</sup>    |
| Co SAs/N-C(900)          | 10                              | 1600                | 0.98                        | 0.881                           | ~1.70                                                   | <sup>13</sup>    |
| Fe-N-SCCFs               | 10                              | 1600                | 1.03                        | 0.883                           | ~2.20                                                   | <sup>14</sup>    |
| CoO/NCNT                 | 5                               | 1600                | 0.93                        | 0.860                           | ~0.10                                                   | <sup>15</sup>    |
| NCNTFs                   | 10                              | 1600                | ~0.98                       | 0.870                           | ~1.04                                                   | <sup>16</sup>    |
| P-CNCo-20                | 20                              | 1600                | 0.93                        | 0.850                           | ~0.06                                                   | <sup>17</sup>    |
| NHPC-900-1000            | 10                              | 1600                | 0.96                        | 0.840                           | ~1.00                                                   | <sup>18</sup>    |
| Cal-CoZIF-VXC72          | 5                               | 1600                | ~0.94                       | 0.840                           | ~0.60                                                   | <sup>19</sup>    |
| Co-NC                    | 5                               | 1600                | ~0.92                       | 0.830                           | ~0.40                                                   | <sup>20</sup>    |
| CoO <sub>x</sub> NPs/BNG | -                               | 1600                | 0.95                        | 0.805                           | ~0.60                                                   | <sup>21</sup>    |

**Table S4** The performance of Zn-air batteries of nonprecious catalysts in 6 M KOH.

| Catalyst                         | Catalyst loading (mg cm <sup>-2</sup> ) | Open-circuit Voltage (V) | Maximum power density (mW cm <sup>-2</sup> ) | Current density @ 1.0 V (mA cm <sup>-2</sup> ) | Ref              |
|----------------------------------|-----------------------------------------|--------------------------|----------------------------------------------|------------------------------------------------|------------------|
| (Fe,Co)/CNT                      | 1 <sub>total</sub>                      | 1.63                     | 260                                          | 180                                            | <b>This work</b> |
| Co@NG-acid                       | 1                                       | ~1.40                    | 350                                          | 250                                            | 22               |
| CoO/N-CNT                        | 1                                       | ~1.40                    | 265                                          | 200                                            | 23               |
| Pyrolyzed FeCo-EDA (FeCo-N-C)    | 1.5                                     | -                        | 232                                          | 150                                            | 24               |
| Fe@N-C-700                       | 2.2                                     | 1.40                     | 220                                          | 157                                            | 25               |
| CuFe                             | -                                       | -                        | 212                                          | ~94                                            | 26               |
| P,S-CNS                          | -                                       | 1.51                     | 198                                          | ~75                                            | 27               |
| N-doped porous carbon nanofibers | 2                                       | -                        | 194                                          | 150                                            | 28               |
| Mn3O4/ketjenblack                | -                                       | -                        | 190                                          | 120                                            | 29               |
| Fe-N-MC                          | 1.2                                     | -                        | ~186                                         | ~107                                           | 30               |
| NCNF-1000                        | 2                                       | 1.48                     | 185                                          | ~119                                           | 31               |
| Co4N/CNW/CC                      | 1                                       | 1.40                     | 174                                          | ~71                                            | 32               |
| 1100-CNS-4                       | 2                                       | 1.49                     | 151                                          | ~71                                            | 33               |
| NiFe@NCx                         | 1                                       | -                        | ~82                                          | ~69                                            | 34               |
| NPMC-1000                        | 0.5                                     | 1.48                     | 55                                           | ~30                                            | 35               |
| 2DBN-800                         | ~1.0                                    | 1.40                     | 14.6                                         | ~11                                            | 36               |

**Table S5.** The adsorption free-energies of ORR intermediates on different active sites of (Fe,Co)/CNT and Co SAs/N-C.

| Adsorbed Sites                 | $\Delta G_{OOH^*}$ (eV) | $\Delta G_{O^*}$ (eV) | $\Delta G_{OH^*}$ (eV) |
|--------------------------------|-------------------------|-----------------------|------------------------|
| Fe-Co dual sites               | 0.47                    | -0.57                 | -1.21                  |
| Fe on OH* anchored (Fe,Co)/CNT | 3.92                    | 2.33                  | 0.99                   |
| Co on OH* anchored (Fe,Co)/CNT | 4.10                    | 2.56                  | 1.12                   |
| Co on Co SAs/N-C               | 3.64                    | 2.57                  | 0.67                   |

## 5. References

1. G. Kresse and J. Furthmüller, *J. Comput. Mater. Sci.*, 1996, **6**, 15-50.
2. G. Kresse and J. Furthmüller, *Phys. Rev. B*, 1996, **54**, 11169.
3. P. E. Blöchl, *Phys. Rev. B*, 1994, **50**, 17953.
4. G. Kresse and D. Joubert, *Phys. Rev. B*, 1999, **59**, 1758.
5. J. P. Perdew, K. Burke and M. Ernzerhof, *Phys. Rev. Lett.*, 1996, **77**, 3865.
6. R. D. Johnson III, *Abstr. Pap. Am. Chem. Soc.* 2000, **219**, U611.
7. K. Mathew, R. Sundararaman, K. Letchworth-Weaver, T. Arias and R. G. Hennig, *J. Chem. Phys.*, 2014, **140**, 084106.
8. J. K. Nørskov, J. Rossmeisl, A. Logadottir, L. Lindqvist, J. R. Kitchin, T. Bligaard and H. Jonsson, *J. Phys. Chem. B*, 2004, **108**, 17886-17892.
9. H. Ren, Y. Wang, Y. Yang, X. Tang, Y. Peng, H. Peng, L. Xiao, J. Lu, H. D. Abruña and L. Zhuang, *ACS Catal.*, 2017, **7**, 6485-6492.
10. R. Cao, R. Thapa, H. Kim, X. Xu, M. Gyu Kim, Q. Li, N. Park, M. Liu and J. Cho, *Nat. Commun.*, 2013, **4**, 2076.
11. Y. Chen, S. Ji, Y. Wang, J. Dong, W. Chen, Z. Li, R. Shen, L. Zheng, Z. Zhuang, D. Wang and Y. Li, *Angew. Chem. Int. Ed.*, 2017, **56**, 6937-6941.
12. W. J. Jiang, L. Gu, L. Li, Y. Zhang, X. Zhang, L. J. Zhang, J. Q. Wang, J. S. Hu, Z. Wei and L. J. Wan, *J. Am. Chem. Soc.*, 2016, **138**, 3570-3578.
13. P. Yin, T. Yao, Y. Wu, L. Zheng, Y. Lin, W. Liu, H. Ju, J. Zhu, X. Hong, Z. Deng, G. Zhou, S. Wei and Y. Li, *Angew. Chem. Int. Ed.*, 2016, **55**, 10800-10805.

14. B. Wang, X. Wang, J. Zou, Y. Yan, S. Xie, G. Hu, Y. Li and A. Dong, *Nano Lett.*, 2017, **17**, 2003-2009.
15. Y. Liang, H. Wang, P. Diao, W. Chang, G. Hong, Y. Li, M. Gong, L. Xie, J. Zhou, J. Wang, T. Z. Regier, F. Wei and H. Dai, *J. Am. Chem. Soc.*, 2012, **134**, 15849-15857.
16. B. Y. Xia, Y. Yan, N. Li, H. B. Wu, X. W. Lou and X. Wang, *Nat. Energy*, 2016, **1**, 15006.
17. Y. Z. Chen, C. Wang, Z. Y. Wu, Y. Xiong, Q. Xu, S. H. Yu and H. L. Jiang, *Adv. Mater.*, 2015, **27**, 5010-5016.
18. M. Wu, K. Wang, M. Yi, Y. Tong, Y. Wang and S. Song, *ACS Catal.*, 2017, **7**, 6082-6088.
19. B. Ni, C. Ouyang, X. Xu, J. Zhuang and X. Wang, *Adv. Mater.*, 2017, **29**, 1701354.
20. A. Aijaz, J. Masa, C. Rosler, W. Xia, P. Weide, A. J. Botz, R. A. Fischer, W. Schuhmann and M. Muhler, *Angew. Chem. Int. Ed.*, 2016, **55**, 4087-4091.
21. Y. Tong, P. Chen, T. Zhou, K. Xu, W. Chu, C. Wu and Y. Xie, *Angew. Chem. Int. Ed.*, 2017, **56**, 7121-7125.
22. M. Zeng, Y. Liu, F. Zhao, K. Nie, N. Han, X. Wang, W. Huang, X. Song, J. Zhong and Y. Li, *Adv. Funct. Mater.*, 2016, **26**, 4397-4404.
23. Y. Li, M. Gong, Y. Liang, J. Feng, J. E. Kim, H. Wang, G. Hong, B. Zhang and H. Dai, *Nat. Commun.*, 2013, **4**, 1805.
24. Z. Chen, J.-Y. Choi, H. Wang, H. Li and Z. Chen, *J. Power Sources*, 2011, **196**, 3673-3677.

25. J. Wang, H. Wu, D. Gao, S. Miao, G. Wang and X. Bao, *Nano Energy*, 2015, **13**, 387-396.
26. J. P. Gyutae Nam, Min Choi, Pilgun Oh, Suhyeon Park, Min Gyu Kim, Noejung Park, Jaephil Cho, and Jang-Soo Lee, *ACS Nano*, 2015, **9**, 6493-6501.
27. S. S. Shinde, C. H. Lee, A. Sami, D. H. Kim, S. U. Lee and J. H. Lee, *ACS Nano*, 2017, **11**, 347-357.
28. G. S. Park, J.-S. Lee, S. T. Kim, S. Park and J. Cho, *J. Power Sources*, 2013, **243**, 267-273.
29. J. S. Lee, G. S. Park, H. I. Lee, S. T. Kim, R. Cao, M. Liu and J. Cho, *Nano Lett.*, 2011, **11**, 5362-5366.
30. H. Tang, Y. Zeng, D. Liu, D. Qu, J. Luo, K. Binnemans, D. E. De Vos, J. Fransaer, D. Qu and S.-G. Sun, *Nano Energy*, 2016, **26**, 131-138.
31. Q. Liu, Y. Wang, L. Dai and J. Yao, *Adv. Mater.*, 2016, **28**, 3000-3006.
32. F. Meng, H. Zhong, D. Bao, J. Yan and X. Zhang, *J. Am. Chem. Soc.*, 2016, **138**, 10226-10231.
33. Zengxia Pei, Hongfei Li, Yan Huang, Qi Xue, Yang Huang, Minshen Zhu, Zifeng Wang and C. Zhi, *Energy Environ. Sci.*, 2017, **10**, 742-749.
34. J. Zhu, M. Xiao, Y. Zhang, Z. Jin, Z. Peng, C. Liu, S. Chen, J. Ge and W. Xing, *ACS Catal.*, 2016, **6**, 6335-6342.
35. J. Zhang, Z. Zhao, Z. Xia and L. Dai, *Nat. Nanotech.*, 2015, **10**, 444-452.
36. X. Zhuang, D. Gehrig, N. Forler, H. Liang, M. Wagner, M. R. Hansen, F. Laquai, F. Zhang and X. Feng, *Adv. Mater.*, 2015, **27**, 3789-3796.
